# Supplementary material
Source: publisher figshare collection journal article supplement (https://gsapubs.figshare.com/articles/dataset/_/12540464)

Hughes, N.C., Myrow, P.M., Ghazi, S., McKenzie, N.R., and DiPietro, J.A., 2018, Cambrian geology of the Salt Range of Pakistan: Linking the Himalayan margin to the Indian craton: GSA Bulletin, <https://doi.org/10.1130/B35092.1>.

## Data Repository

**Supplemental Document 1:** Spelling of Formation Names

**Supplemental Document 2:** Stratigraphy and Correlations of Pakistani Cambrian Rocks North of the Panjal-Khairabad Fault

**Supplemental Document 3:** Detrital zircon analysis

**Table.** Summary of SHRIMP U-Pb zircon results for sample 14-105, Tanawal Formation, Pakistan.

**Figure DR1.** Biostratigraphic correlation between the Salt Range, Indian craton, Lesser Himalaya, and Tethyan Himalaya based on modern taxonomy. Purple bar shows species-level correlation based on body fossils. Note that the earliest Cambrian record is highly condensed, and that the zone of correlation among Himalayan lithotectonic belts is of short duration. The age of the Nagaur Group trace fossil assemblage is early Cambrian, but its exact age is not precisely constrained. Modified from Hughes (2016, fig. 14), with attention drawn to the revised stratigraphic occurrence of cf. *Y. szechuanensis* which was reported from the Khussak and Jutana formations (Redlich, 1899), not from the Khewra Formation.

## **Supplementary Document 1: Spelling of Formation Names**

The Stratigraphic Committee of Pakistan stated that the “spelling in the latest edition of the Survey of Pakistan map is to be used” for formation names (Rahman, 1967, A-11, p. 2,) and Fatmi (1973) thus spelt the Jhleum Group formation names as Khwera, Kussak, Jutana, and Baghanwala. However, the Pakistani code declared itself to be provisional until an international code was designated (Day *in* Rahman, 1967, p iii). Accordingly, we follow the International Subcommission on Stratigraphic Classification’s precept that “the spelling of the geographic component, once established, should not be changed” (Murphy and Salvador, 1999, p. 258) and thus use Noetling’s (1894) original spellings.

Fatmi, A. N., 1973, Lithostratigraphic units of Kohat-Potwar Province, Indus basin: *Memoirs of the Geological Survey of Pakistan*, v. 10, p. 1-80.

Murphy, M. A., and Salvador, A., 1999, International Subcommission on Stratigraphic Classification of IUGS International Commission on Stratigraphy. *International stratigraphic guide: An abridged version: Episodes*, v. 22, no. 4, p. 255-271.

Noetling, F., 1894, On the Cambrian Formation of the Eastern Salt Range: *Records of the Geological Survey of India*, v. 27, no. 3, p. 71-86.

Rahman, H., 1967, Stratigraphic code of Pakistan: *Memoirs of the Geological Survey of Pakistan*, v. 4, no. 1, p. 1-28.

## **Supplemental Document 2: Stratigraphy and Correlations of Pakistani Cambrian Rocks North of the Panjal-Khairabad Fault**

Correlation between parts of Jhelum Group of the Salt Range, the Tal Group of the Indian Lesser Himalaya, and the Parahio Formation of the Indian Tethyan Himalaya is possible to a precision within a few million years based on shared brachiopod and trilobite taxa (Hughes, 2016). These correlation and others (e.g., a late Neoproterozoic diamictite in both the Lesser and Tethyan Himalaya) demonstrate a notable facies change between the upper Neoproterozoic and Cambrian rocks of the Lesser and Tethyan Himalaya (Myrow et al., 2015) that occurs within in Pakistan across the Panjal–Khairabad Fault. In the Peshawar basin to the north, rocks of Silurian and younger age have been palaeontologically dated (Pogue et al., 1992), but the ages of underlying Paleozoic and Neoproterozoic rocks are not well constrained (Figs. 3,4). North of the Panjal–Khairabad Fault near Misri Banda, the pre-Silurian Misri Banda Quartzite unconformably overlies carbonate, now assigned to the Ambar Formation (Pogue et al., 1992). Pogue and Hussain (1986) (Pogue and Hussain, 1986) and Pogue et al. (1992, p. 920) recognized the Misri Banda Quartzite as Ordovician based on the occurrence of the trace fossil *Cruziana rugosa*. The particular patterns of scratch mark corrugation and striation confirm an age constraint of Early to Middle Ordovician (Floian to Darrawilian) (i.e. ~477 – 458 Ma) for these rocks from the upper beds of the formation (MacNaughton, 2007;

Mángano et al., 2016). This is consistent with detrital zircon spectra data (Myrow et al., 2010, fig. 3).

As the Misri Banda Quartzite is Ordovician and sits unconformably on older deformed rock of sedimentary protolith (Palin et al., 2018), its stratigraphic position is apparently analogous to the Tethyan Thaple, Shian and Ralam formations of the Zaskar, Spiti and Kumaon regions of India, respectively, and its basal unconformity seemingly reflects the Kurgakh orogeny that affected both the north India margin and other parts of equatorial Gondwana at the time (Myrow et al., 2016) (Figs. 3,4).

The ages of rocks beneath that unconformity are presently poorly constrained. These rocks include the siliciclastic Tanawal Formation and, where preserved, the conformably overlying carbonate-rich Ambar Formation (Pogue et al., 1992). We agree with Pogue et al. (1992, fig. 6) that the up to ~400 m thick Ambar Formation (Pogue et al., 1992, fig. 4) is likely correlative with the carbonate-rich Karsha Formation of Zaskar, which is of similar thickness (Gaetani et al., 1986; Myrow et al., 2006). The base of the Karsha was deposited at ~504 Ma (Hughes, 2016), fig. 14). Pogue et al. (1992, p. 917) argued for a Cambrian age for the Ambar Formation, based in part on the presence of shell fragments in the centers of pisoliths. If this correlation is correct, it would place the Tanawal Formation as correlative with the Parahio and/or the Phe formations of Zaskar, indicating that these Pakistani rocks correlate to the Indian Tethyan Himalaya, and that deposition of the Tanawal Formation may have extended into the early or middle Cambrian. Pogue et al. (1992, p. 916) reported that the Tanawal Formation is intruded by the Mansehra granite, dated using Rb/Sr isotopes as 516 +/- 16 Ma (LeFort et al., 1980), which provides an approximate minimum depositional age for the unit. This is further supported by recent evidence of metamorphism of these rocks around 475 Ma (Palin et al., 2018). A detrital zircon grain in our Tanawal sample (Tanaw-14-105) (Fig. 11) has an age of about 570 Ma with relatively narrow error estimates (+/- 7 Ma), suggesting a maximum depositional age of late Neoproterozoic. Its age distribution resembles that of Neoproterozoic and Cambrian rocks in the region, including those of the Salt Range and Tethyan Himalaya, and it may be significant that it lacks its lack a prominent peak shown around 1.8 Ga that is characteristic of rocks of this age from Lesser Himalaya (Figs. 12,13). In summary, the thickness of the Tanawal Formation, its lack a prominent peak shown around 1.8 Ga, the presence of the Ambar Formation conformably above it, with the unconformably overlying Misri Banda Quartzite above that, are all reasons why we view the Tanawal Formation as more allied to the Tethyan Himalaya than the Lesser Himalaya (*contra* Palin et al., 2018), but we agree with those authors that all these areas were originally part of a continuous margin.

We disagree with Pogue et al.'s (1992) and Qasim et al.'s (2014, fig. 6; 2015, fig. 5) correlation of the Ambar Formation with the 580 m thick Sirban Formation of the Abbottabad area, south of the Panjal–Khairabad fault, from which no fossils are yet known. The Sirban Formation is stratigraphically overlain by earliest Cambrian (Terreneuvian) fossil-bearing deposits of the Tarnawai/Hazira Formation, and therefore must predate the late Terreneuvian and likely be of late

Neoproterozoic age. We thus correlate the Sirban Formation with the ~ 1000 m thick Neoproterozoic Krol Group of the northern Indian Lesser Himalaya (Jiang et al., 2002; Myrow et al., 2015, fig. 2). Likewise, we question Pogue et al.'s (1992, fig. 6) and Qasim et al.'s (2015, fig. 5) suggested correlation of the Ambar Formation with the lower Cambrian Jhelum Group of the Salt Range because, as detailed above, the Ambar Formation more likely correlates with the Karsha Formation of India, an uppermost middle Cambrian deposit that is ~8 million years younger than the fossiliferous part of the Jhelum Group (Hughes, 2016).

There are several other areas of Pakistan in which rock units have been mooted, on the basis of stratigraphic relationships, to be late Neoproterozoic or Cambrian. Possibilities include the highly deformed Manglaur Formation in Swat (Pogue et al., 1992) and the Shaghai and Landi Kotal Formations in the Khyber region (Pogue et al., 1992; Shah, 1977). In our view, too little is known of these rocks at present to consider them correlative, and that further work on the depositional ages of all units discussed is needed.

- Gaetani, M., Casnedi, R., Fois, E., Garzanti, E., Jadoul, F., Nicora, A., and Tintori, A., 1986, Stratigraphy of the Tethys Himalaya in Zaskar, Ladakh: *Rivista Italiana di Paleontologia e Stratigrafia*, v. 48, p. 237-265.
- Hughes, N. C., 2016, The Cambrian palaeontological record of the Indian subcontinent: *Earth-Science Reviews*, v. 159, p. 428-461.
- Jiang, G., Christie-Blick, N., Kaufman, A. J., Banerjee, D. M., and Rai, V., 2002, Sequence stratigraphy of the Neoproterozoic Infra Krol Formation and Krol Group, Lesser Himalaya, India: *Journal of Sedimentary Research*, v. 72, p. 524-542.
- LeFort, P., Francois, D., and Sonet, J., 1980, The "Lesser Himalayan" cordierite granite belt, typology and age of the pluton of Manserah (Pakistan):: *Peshawar University Geological Bulletin*, v. 13, p. 51-61.
- MacNaughton, R. B., 2007, The application of trace fossils to biostratigraphy, in Miller, W. I., ed., *Trace Fossils: Concepts, Problems, Prospects*, Elsevier, p. 135-148.
- Mángano, M. G., Buatois, L. A., Milson, M. A., and Droser, M. L., 2016, The Great Ordovician Biodiversification Event, in Mángano, M. G., and Buatois, L. A., eds., *The Trace-Fossil Record on Major Evolutionary Events, Volume Topics in Geobiology 39*: Dordrecht, Springer, p. 127-156.
- Myrow, P. M., Hughes, N. C., Derry, L. A., McKenzie, N. R., Jiang, G.-Q., Webb, A. A. G., Banerjee, D. M., Paulsen, T. S., and Singh, B. P., 2015, Neogene marine isotopic evolution and the erosion of Lesser Himalayan strata: implications for Cenozoic tectonic history: *Earth and Planetary Science Letters* v. 417, p. 142-150.
- , -, Goodge, J. W., Fanning, C. M., Peng, S.-C., Bhargava, O. N., Tangri, S. K., Parcha, S. K., and Pogue, K. R., 2010, Extraordinary transport and mixing of sediment across Himalayan central Gondwanaland during the Cambrian-Ordovician: *Geological Society of America Bulletin*, v. 122, p. 1660-1670.

- , McKenzie, N. R., Pelgay, P., Thompson, T. J., Haddad, E. E., and Fanning, C. M., 2016, Cambrian-Ordovician orogenesis in Himalayan equatorial Gondwana: Geological Society of America Bulletin, v. 128, no. 11/12, p. 1679-1695.
- , Snell, K. E., Hughes, N. C., Paulsen, T. S., Heim, N. A., and Parcha, S. K., 2006, Cambrian depositional history of the Zaskar Valley region of Indian Himalaya: Tectonic implications: Journal of Sedimentary Research, v. 76, p. 364-381.
- Palin, R. M., Treloar, P. J., Searle, M. J., Wald, T., White, R. W., and Mertz-Kraus, R., 2018, U-Pb monazite ages from the Pakistan Himalaya record pre-Himalayan Ordovician orogeny and Permian continental breakup: Geological Society of America Bulletin, v. 2018.
- Pogue, K., and Hussain, A., 1986, New light on the stratigraphy of the Nowshera area and the discovery of early to middle Ordovician trace fossils in N.W.F.P., Pakistan: Geological Survey of Pakistan Information Release v. 135, p. 1-15.
- , Wardlaw, B. R., Harris, A. G., and Hussain, A., 1992, Paleozoic and Mesozoic stratigraphy of the Peshawar basin, Pakistan: Correlations and implications: Geological Society of American Bulletin, v. 104, p. 915-927.
- Qasim, M., Khan, M. A., and Haneef, M., 2014, Stratigraphic characterization of the Early Cambrian Abbottabad Formation in the Sherwan area, Hazara region, Northern Pakistan: Implications for Early Paleozoic stratigraphic correlation in NW Himalayas, Pakistan: Journal of Himalayan Earth Sciences, v. 47, no. 1, p. 25-40.
- , 2015, Stratigraphic characterization and structural analysis of the northwestern Hazara Ranges across Panjal Thrust, northern Pakistan: Arabian Journal of Geosciences.
- Shah, S. M. I., 1977, Stratigraphy of Pakistan, Memoirs of the Geological Survey of Pakistan, Volume 12, Geological Survey of Pakistan, p. 138.

### **Supplemental Document 3: Detrital zircon analysis**

The Tanawal sample was analyzed at the Research School of Earth Sciences, Australia National University using a sensitive high-resolution ion microprobe (SHRIMP) using procedures given in Williams (1998). Zircon grains were imaged using reflected and transmitted light microscopy, cathodoluminescence (CL), and scanning electron microscopy (SEM). Sectioned grains were imaged using CL to determine their internal structures and to ensure that the ~20  $\mu\text{m}$  SHRIMP spots were wholly within the youngest single age component (i.e., the rims). The SQUID Excel macro (Ludwig, 2001) was used to process the data. U/Pb ratios were normalized relative to a value of 0.0668 for the Temora reference zircon, equivalent to an age of 417 Ma (Black et al., 2003). Uncertainties given for individual analyses (ratios and ages) are at the 1s level (see Supplementary Document 4). Correction for common Pb was made either using the measured  $^{204}\text{Pb}/^{206}\text{Pb}$  ratio in the normal manner, or for grains younger

than ~800 Ma (or those low in U and so radiogenic Pb) the  $^{207}\text{Pb}$  correction method has been used (see Williams, 1998). When the  $^{207}\text{Pb}$  correction is applied it is not possible to determine radiogenic  $^{207}\text{Pb}/^{206}\text{Pb}$  ratios or ages. In general the  $^{207}\text{Pb}/^{206}\text{Pb}$  ages have been used in the probability density spectra for areas older than 800 Ma, whereas for zircons <800 Ma the  $^{206}\text{Pb}/^{238}\text{U}$  age is used. The concentration of U, and thereby radiogenic Pb, is also taken into account for selecting preferred ages. A number of areas analyzed have been interpreted to be discordant and this has been based in part on the proximity to the concordia curve (using the total ratios, uncorrected for common Pb), and in part on whether the radiogenic  $^{206}\text{Pb}/^{238}\text{U}$  age is part of a grouping of like ages, or a single outlier significantly younger than the inferred depositional age of the strata. Such interpreted discordant analyses have been excluded from the age spectra.

All Salt Range samples (Khewra, Khussak, and Bhaganwalla formations) collected for detrital zircon U-Pb geochronology were processed and analyzed at the UTChron laboratory, Department of Geological Sciences, University of Texas at. Zircon grains were extracted from sandstone samples using standard mineral separation techniques, which included crushing, passing samples over a density-separation water table, magnetic separation, and heavy liquids. Whole individual zircon grains were fixed on a ~1 inch resin mount with double-sided tape for analysis via laser ablation inductively coupled mass spectrometry (LA-ICP-MS). Mounts were placed into a Helex 9 sample cell, volume c.30 cm<sup>3</sup>, and ablated with a 30 µm spot from a Photon Machines Analyte G2 ATLex 300si ArF Excimer laser. Ablated material was carried by helium gas to a ThermoFisher Element2 double-focusing magnetic sector ICP-MS for isotopic measurements. Data analysis was accomplished using Lolite (Igor Pro). Further details provided in the table below.

- Black, L. P., Kamo, S. L., Allen, C. M., Aleinikoff, J., N., Davis, D. W., Korsch, R. J., and Foudoulis, C., 2003, TEMORA 1: a new zircon standard for Phanerozoic U–Pb geochronology: *Chemical Geology*, v. 200, no. 1-2, p. 155-170.
- Ludwig, K. R., 2001, SQUID, version 1.02, A User's Manual, Berkeley, CA, Berkeley Geochronology Center, Special Publication no. 2, 17 p.:
- Williams, I. S., 1998, U–Th–Pb geochronology by ion microprobe, *in* McKibben, M. A., Shanks III, W. C., and Ridley, W. I., eds., *Applications of Microanalytical Techniques to Understanding Mineralizing Processes*, Volume 7, *Reviews in Economic Geology*, p. 1-35.

## Data reporting Information for LA-ICP-MS U-Pb data

| Laboratory & Sample Preparation |                                                                                                                                                            |
|---------------------------------|------------------------------------------------------------------------------------------------------------------------------------------------------------|
| Laboratory name                 | UTChron, Department of Geological Sciences, University of Texas at Austin                                                                                  |
| Sample type/mineral             | Detrital zircons                                                                                                                                           |
| Sample preparation              | Conventional mineral separation, 1 inch resin mount, grain mount on double-sided tape                                                                      |
| Laser ablation system           |                                                                                                                                                            |
| Make, Model & type              | PhotonMachines Analyte.G2 ATLex 300si ArF Excimer laser                                                                                                    |
| Ablation cell & volume          | Helex 9 sample cell, volume c.30cm <sup>3</sup>                                                                                                            |
| Laser wavelength                | 193 nm                                                                                                                                                     |
| Pulse width                     | ≤ 4ns                                                                                                                                                      |
| Energy                          | 6 mJ, laser attenuator 16%                                                                                                                                 |
| Fluence                         | 1.43 J.cm <sup>-2</sup>                                                                                                                                    |
| Repetition rate                 | 10 Hz                                                                                                                                                      |
| Spot size                       | 30μm                                                                                                                                                       |
| Sampling mode                   | 6 preablation shots, 35 sec of baseline data collection, 300 ablation shots, 27 sec washout                                                                |
| Sample cell washout time (s)    | <0.5 sec                                                                                                                                                   |
| Carrier gas                     | He: 0.5 L/min (ultrapure)                                                                                                                                  |
| Ablation duration/depth         | 30 secs at ~0.5μm/sec for depth of 15-17 μm                                                                                                                |
| ICP-MS Instrument               |                                                                                                                                                            |
| Make, Model & type              | ThermoFisher Element2 double-focusing magnetic sector ICP-MS                                                                                               |
| Sample introduction             | Ablation aerosol (dry plasma)                                                                                                                              |
| RF power                        | 1000-1100 W                                                                                                                                                |
| Cooling gas                     | Ar: 16 L/min                                                                                                                                               |
| Auxiliary gas                   | Ar: 0.79 L/min                                                                                                                                             |
| Sample gas                      | He: 0.93-1.0 L/min                                                                                                                                         |
| Make-up gas flow                | N <sub>2</sub> : 2 L/min                                                                                                                                   |
| Detection system                | Secondary electron multiplier (SEM)                                                                                                                        |
| Masses measured                 | 202, 204, 206, 207, 208, 232, 235, 238, 254                                                                                                                |
| Dwell time                      | 4 ms (238U); 16 ms (207Pb)                                                                                                                                 |
| Sensitivity (238U)              | 0.4% (238U dry aerosol)                                                                                                                                    |
| Data Processing                 |                                                                                                                                                            |
| Gas blank                       | 35 second on-peak zero subtracted                                                                                                                          |
| Calibration strategy            | GJ1 used as primary reference material, Pak1 (internal) used as secondary reference material                                                               |
| Reference Material info         | GJ1 <sup>206</sup> Pb/ <sup>238</sup> U 601.7 ± 1.3Ma, <sup>207</sup> Pb/ <sup>206</sup> Pb 607 ± 4Ma (Jackson et al, 2004, Kylander-Clark et al., 2013)   |
| Data processing package used    | Iolite (Igor Pro)                                                                                                                                          |
| Mass discrimination             | <sup>206</sup> Pb/ <sup>238</sup> U, <sup>207</sup> Pb/ <sup>235</sup> U and <sup>208</sup> Pb/ <sup>232</sup> U normalized to reference material          |
| Common-Pb correction            | None applied                                                                                                                                               |
| Uncertainty level & propagation | Ages are quoted at 2 sigma absolute error, propagation is by quadratic addition. Reproducibility and age uncertainty of reference material are propagated. |
|                                 |                                                                                                                                                            |
|                                 |                                                                                                                                                            |

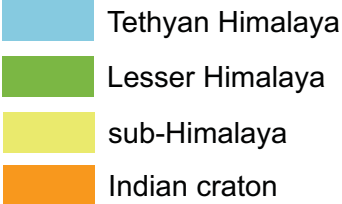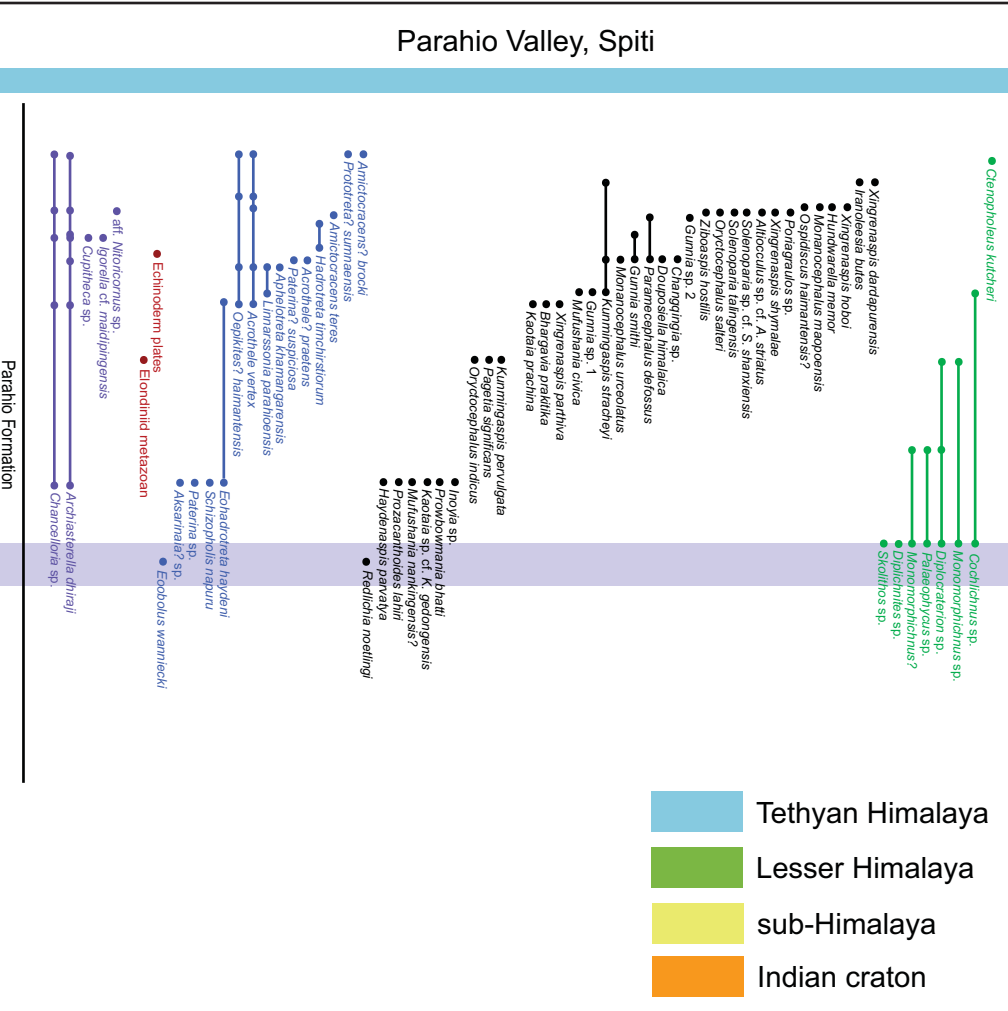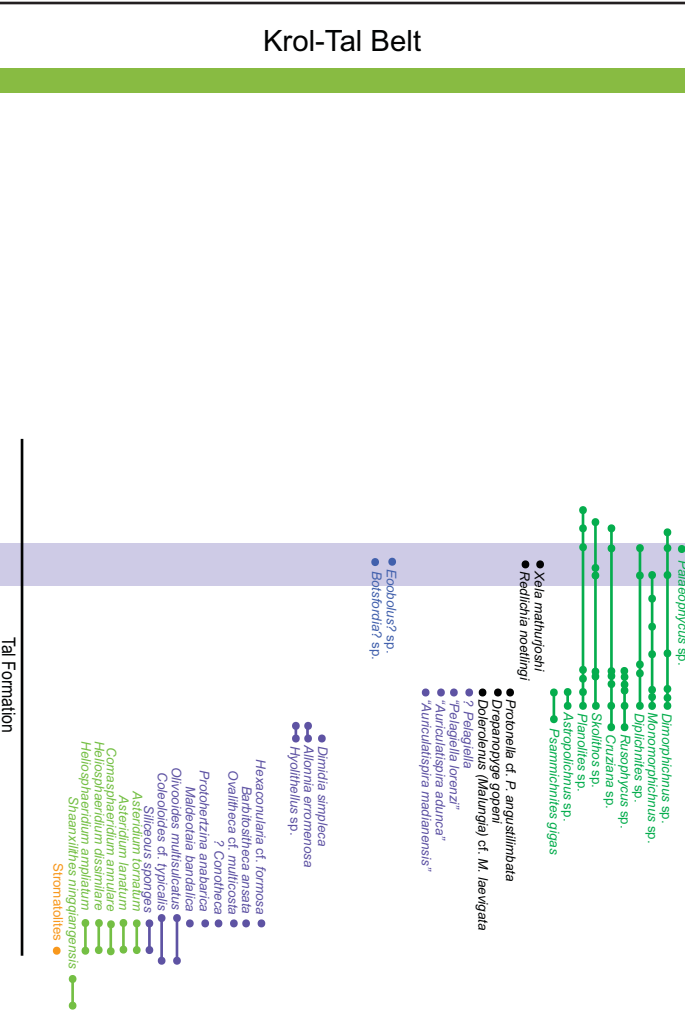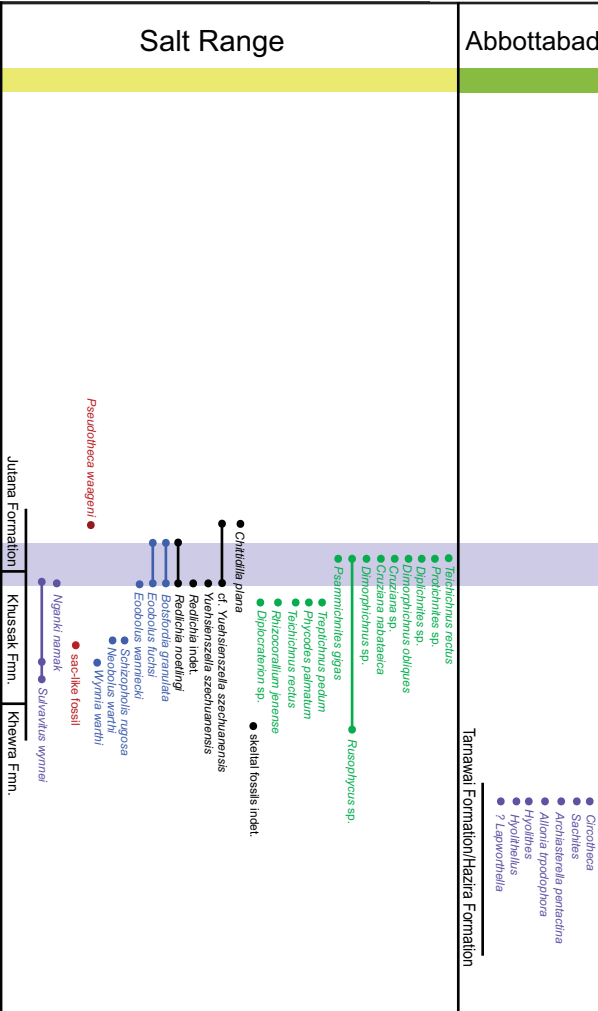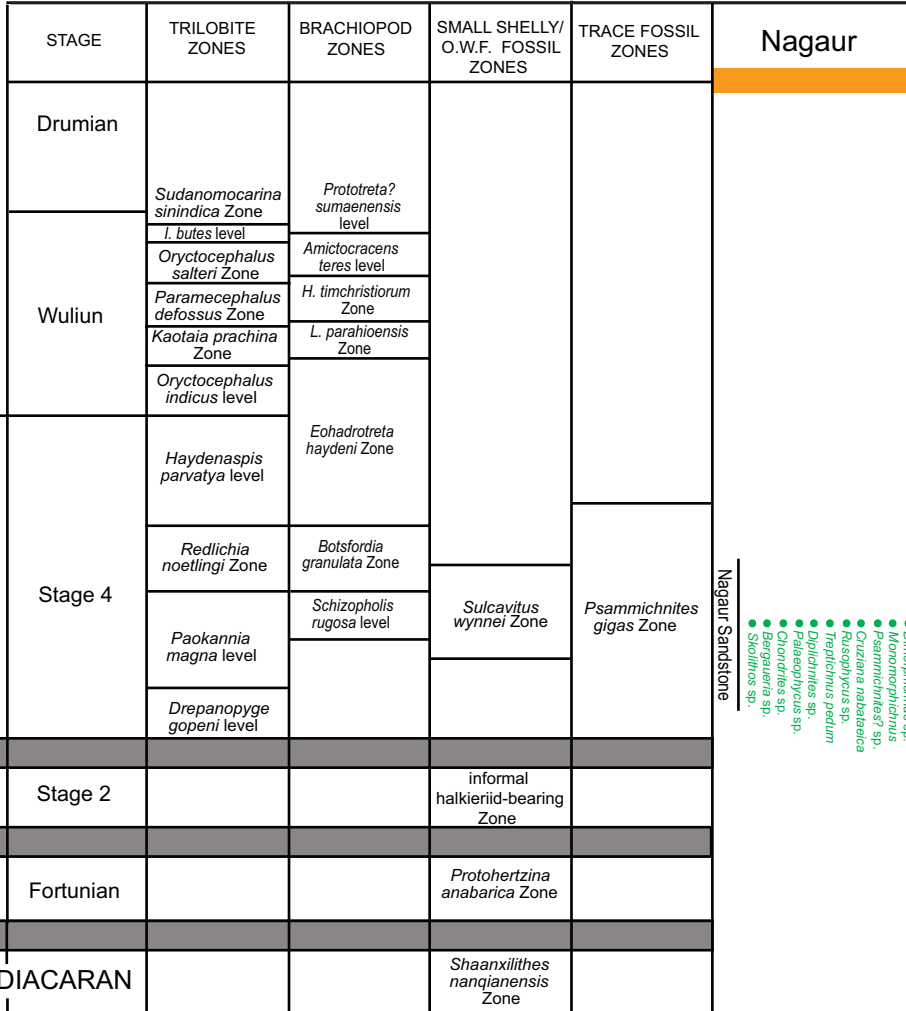

Supplement: Supplementary file 1 [file 1]
